# Supplementary material
Source: ML conference proceedings conference paper supplement (https://openreview.net/forum?id=PYAFKBc8GL4)
Supplement: supplementary_material [file attachment]

## Quadratic & Synthetic Simulation

### **Requirements:**

- Python 3.5

### **Example Run:**

- Quadratic simulation:
  - To run optimizer: `python3.5 quadratic_sim.py`
  - To get rho values: `python3.5 quadratic_theorho.py`
- Synthetic simulation:
  - `python 3.5 run_synthetic.py`

## DNN Experiment

### **Requirements**

- Python 3.5
- PyTorch 1.0.0
- TorchVision 0.2.1
- pdsh, parallel shell

### **Example Run:**

To run the algorithms run this command.

```
bash launch_exp.sh
```

Change the parameters accordingly. Need to change distributed training parameters according to cluster information including `--initmethod` and host names.
